# Supplementary material
Source: PubMed Central journal article supplement (PMC5100786)
Supplement: supp_pp.16.01245_PP2016-01245DR1_Supplemental_Material.pdf [file supp_pp.16.01245_PP2016-01245DR1_Supplemental_Material.pdf]

# Two Different Transcripts of a LAMMER Kinase Gene Play Opposite Roles in Rice Disease Resistance

Liu Duan, Wenfei Xiao, Fan Xia, Hongbo Liu, Jinghua Xiao, Xianghua Li, and Shiping Wang

## Supplemental Data

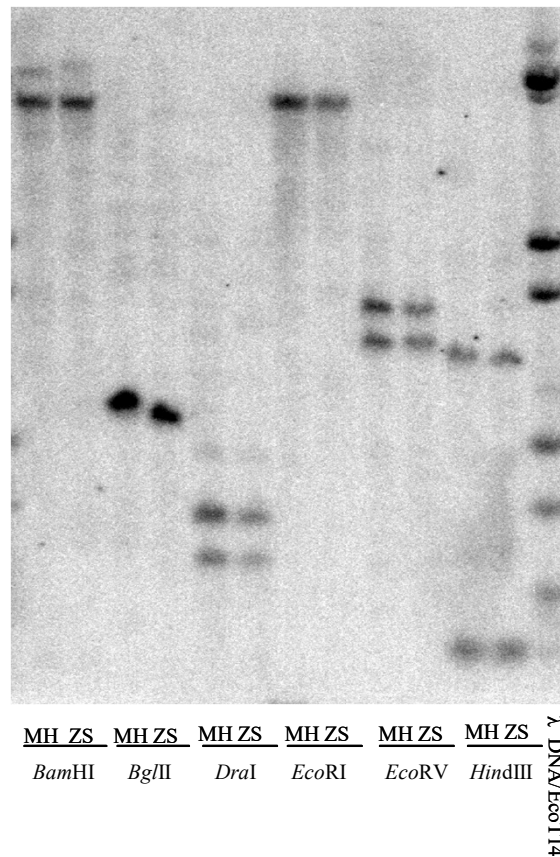

**Supplemental Figure S1.** DNA gel blot analysis of *OsDR11* gene in rice varieties Minghui 63 (MH) and Zhenshan 97 (ZS).

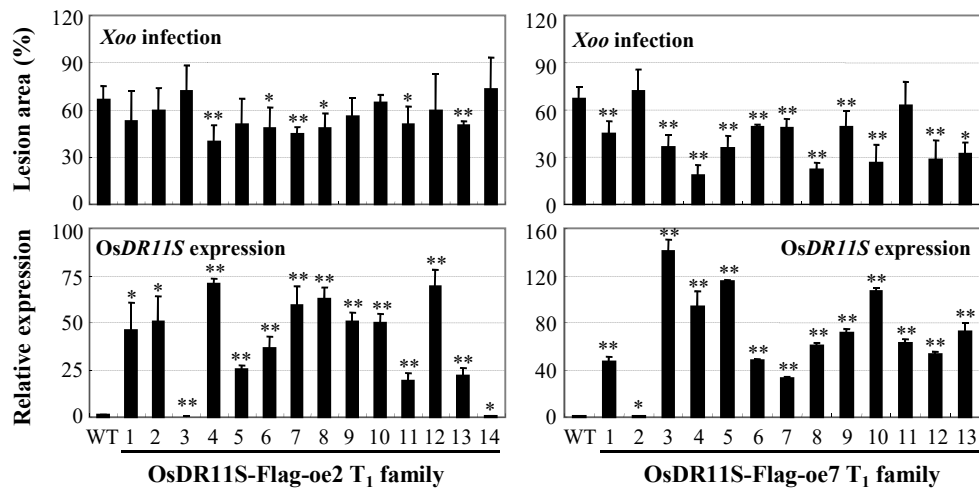

**Supplemental Figure S2.** Enhanced resistance to *Xoo* was associated with overexpression of *OsDR11S* in two T<sub>1</sub> families. Plants were inoculated with *Xoo* strain PXO99 at the booting (panicle development) stage. Bars represent mean (three to six replicates from one plant for l area and three replicates from one plant for gene expression)  $\pm$  standard deviation. Asterisks indicate significant difference between transgenic and wild-type (WT) plants at \*\* $P < 0.01$  or \* $P < 0.05$ .

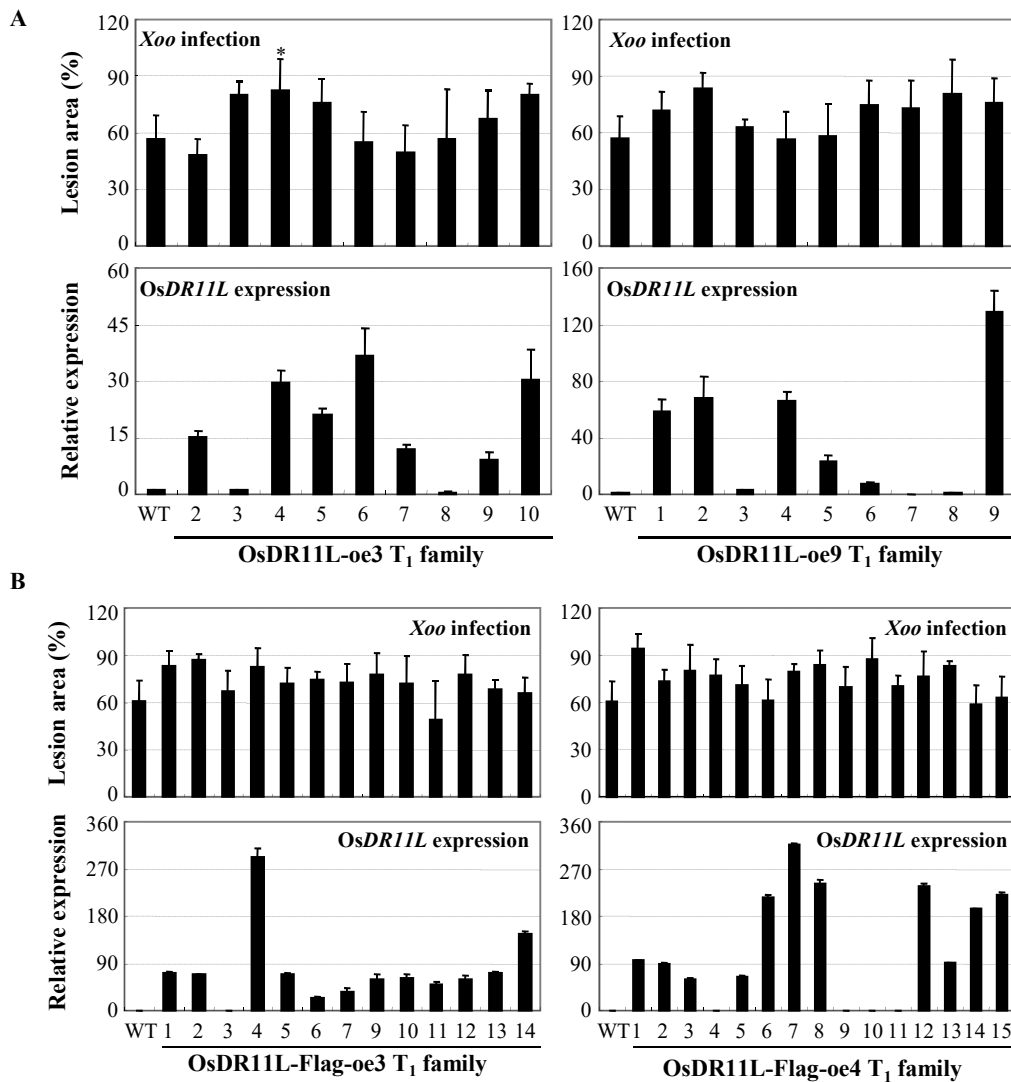

**Supplemental Figure S3.** The response of OsDR11L-oe (A) and OsDR11L-Flag-oe (B) plants to infection by *Xoo* strain PXO99 was not closely associated with overexpression of *OsDR11L*, respectively. The plants were inoculated with PXO99 at the booting stage. Bars represent means (three replicates)  $\pm$  standard deviation..

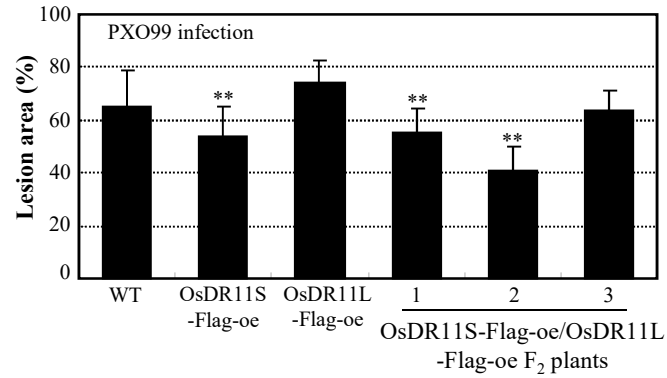

**Supplemental Figure S4.** The F<sub>2</sub> plants overexpressing both *OsDR11S-Flag* and *OsDR11L-Flag* showed the phenotype of *OsDR11S-Flag-oe* line in response to *Xoo* infection. Plants were inoculated with *Xoo* strain PXO99 at the booting stage. The F<sub>2</sub> plants were generated from a cross between *OsDR11S-Flag-oe* and *OsDR11L-Flag-oe* lines. WT, wild-type Mudanjiang 8. 1, F<sub>2</sub> plants carrying both *OsDR11S-Flag* and *OsDR11L-Flag* constructs; 2, F<sub>2</sub> plants carrying only *OsDR11S-Flag* construct; 3, F<sub>2</sub> plants carrying only *OsDR11L-Flag* construct. Data represent mean (30 to 32 plants for F<sub>2</sub> carrying both *OsDR11S-Flag* and *OsDR11L-Flag* constructs, 15 to 20 plants for *OsDR11S-Flag-oe* line and *OsDR11L-Flag-oe* line, and three to four plants for the F<sub>2</sub> carrying only *OsDR11S-Flag* or *OsDR11L-Flag* construct)  $\pm$  standard deviation. Asterisks indicate significant difference between transgenic or F<sub>2</sub> and WT at \*\* $P < 0.01$  or \* $P < 0.05$ .

**Supplemental Table S1.** The phenotype of *OsDR11S*-overexpressing T<sub>0</sub> plants after inoculation with *Xoo* strain PXO99

| <b>Rice material</b>      | <b>Lesion area (%)<sup>a</sup></b> | <b><i>P</i>-value<sup>b</sup></b> |
|---------------------------|------------------------------------|-----------------------------------|
| OsDR11S-oe31              | 37.4±11.7                          | 0.061                             |
| OsDR11S-oe32              | 36.1±14.3                          | 0.083                             |
| OsDR11S-oe33              | 14.2±9.3                           | 0.000                             |
| OsDR11S-oe34              | 46.0±6.8                           | 0.126                             |
| OsDR11S-oe35 <sup>c</sup> | 64.0±15.6                          | 0.429                             |
| OsDR11S-oe36              | 68.0±9.0                           | 0.087                             |
| OsDR11S-oe37              | 39.0±4.7                           | 0.004                             |
| OsDR11S-oe38              | 42.4±12.9                          | 0.168                             |
| OsDR11S-oe51 <sup>c</sup> | 61.9±4.2                           | 0.099                             |
| OsDR11S-oe52              | 31.6±16.2                          | 0.048                             |
| OsDR11S-oe53              | 51.2±21.8                          | 0.731                             |
| OsDR11S-oe54              | 25.0±8.7                           | 0.001                             |
| OsDR11S-oe55              | 55.7±21.5                          | 0.986                             |
| OsDR11S-oe56              | 18.4±8.1                           | 0.000                             |
| OsDR11S-oe57 <sup>c</sup> | 52.0±15.8                          | 0.699                             |
| OsDR11S-oe58              | 26.2±7.5                           | 0.002                             |
| OsDR11S-oe59              | 67.7±10.9                          | 0.143                             |
| OsDR11S-oe60              | 21.2±14.7                          | 0.008                             |
| OsDR11S-oe61 <sup>c</sup> | 68.0±7.0                           | 0.038                             |
| OsDR11S-oe62 <sup>c</sup> | 76.7±8.3                           | 0.008                             |
| OsDR11S-oe63 <sup>c</sup> | 72.4±21.2                          | 0.244                             |
| Mudanjiang 8 (wild type)  | 59.8±11.0                          |                                   |

<sup>a</sup>Data were from four to five flag leaves of each plant at the booting (panicle development) stage. Disease on leaves was scored at 14 days after infection.

<sup>b</sup>Each *P*-value was calculated in comparison with wild-type Mudanjiang 8.

<sup>c</sup>The negative transgenic plants detected by PCR analysis.

**Supplemental Table S2.** The phenotype of *OsDR11S*-suppressing T<sub>0</sub> plants after inoculation with *Xoo* strain PXO99

| Rice material             | Lesion area (%) <sup>a</sup> | <i>P</i> -value <sup>b</sup> |
|---------------------------|------------------------------|------------------------------|
| OsDR11-ami6 <sup>c</sup>  | 53.3 ± 4.1                   | 0.117                        |
| OsDR11-ami7 <sup>c</sup>  | 53.6 ± 7.9                   | 0.239                        |
| OsDR11-ami8               | 66.9 ± 8.7                   | 0.046                        |
| OsDR11-ami9               | 62.6 ± 4.4                   | 0.040                        |
| OsDR11-ami10              | 69.5 ± 15.4                  | 0.036                        |
| OsDR11-ami16              | 67.1 ± 7.1                   | 0.007                        |
| OsDR11-ami17              | 60.8 ± 14.5                  | 0.283                        |
| OsDR11-ami18              | 56.9 ± 19.1                  | 0.492                        |
| OsDR11-ami19              | 68.6 ± 14.5                  | 0.029                        |
| OsDR11-ami20              | 75.8 ± 18.1                  | 0.038                        |
| OsDR11-ami21 <sup>c</sup> | 62.5 ± 14.8                  | 0.139                        |
| OsDR11-ami27 <sup>c</sup> | 59.8 ± 6.5                   | 0.201                        |
| OsDR11-ami28 <sup>c</sup> | 52.4 ± 14.8                  | 0.334                        |
| OsDR11-ami29 <sup>c</sup> | 63.2 ± 9.4                   | 0.107                        |
| OsDR11-ami30              | 70.9 ± 11.0                  | 0.011                        |
| OsDR11-ami31 <sup>c</sup> | 57.7 ± 16.3                  | 0.450                        |
| OsDR11-ami32 <sup>c</sup> | 58.9 ± 6.6                   | 0.261                        |
| OsDR11-ami33 <sup>c</sup> | 59.4 ± 8.0                   | 0.282                        |
| OsDR11-ami39              | 78.3 ± 13.2                  | 0.009                        |
| OsDR11-ami40              | 74.4 ± 7.3                   | 0.001                        |
| OsDR11-ami41              | 74.3 ± 14.2                  | 0.014                        |
| OsDR11-ami42              | 71.4 ± 6.6                   | 0.002                        |
| OsDR11-ami43              | 73.1 ± 15.0                  | 0.057                        |
| OsDR11-ami44              | 63.0 ± 5.4                   | 0.034                        |
| Minghui 63 (wild type)    | 56.7 ± 10.0                  |                              |

<sup>a</sup>Data were from four to five flag leaves of each plant at the booting stage. Disease on leaves was scored at 14 days after infection.

<sup>b</sup>Each *P*-value was calculated in comparison with wild-type Minghui 63.

<sup>c</sup>The negative transgenic plants detected by PCR analysis.

**Supplemental Table S3.** The phenotype of *OsDR11L*-overexpression T<sub>0</sub> plants inoculated with *Xoo* strain PXO99

| <b>Rice material</b>     | <b>Lesion area (%)<sup>a</sup></b> | <b><i>P</i>-value<sup>b</sup></b> |
|--------------------------|------------------------------------|-----------------------------------|
| OsDR11L-oe1              | 50.9±9.3                           | 0.942                             |
| OsDR11L-oe2              | 58.6±9.4                           | 0.498                             |
| OsDR11L-oe3              | 76.2±4.5                           | 0.012                             |
| OsDR11L-oe4              | 56.3±12.8                          | 0.543                             |
| OsDR11L-oe5              | 31.4±18.6                          | 0.127                             |
| OsDR11L-oe6              | 42.8±11.4                          | 0.458                             |
| OsDR11L-oe7 <sup>c</sup> | 79.0±4.5                           | 0.006                             |
| OsDR11L-oe8              | 66.3±10.2                          | 0.150                             |
| OsDR11L-oe9              | 80.5±5.5                           | 0.005                             |
| OsDR11L-oe10             | 44.3±5.5                           | 0.528                             |
| OsDR11L-oe11             | 73.8±5.6                           | 0.021                             |
| OsDR11L-oe12             | 47.5±11.0                          | 0.781                             |
| OsDR11L-oe13             | 54.7±19.7                          | 0.681                             |
| OsDR11L-oe14             | 48.2±8.3                           | 0.834                             |
| OsDR11L-oe15             | 50.8±13.4                          | 0.955                             |
| OsDR11L-oe16             | 60.8±15.5                          | 0.315                             |
| OsDR11L-oe17             | 69.1±15.8                          | 0.084                             |
| OsDR11L-oe18             | 62.8±17.6                          | 0.289                             |
| OsDR11L-oe19             | 43.8±17.3                          | 0.549                             |
| OsDR11L-oe20             | 64.2±15.2                          | 0.227                             |
| Mudanjiang 8 (wild type) | 50.2±19.7                          |                                   |

<sup>a</sup>Data were from four to five flag leaves of each plant at the booting stage. Disease on leaves was scored at 14 days after infection.

<sup>b</sup>Each *P*-value was calculated in comparison with wild type Mudanjiang 8.

<sup>c</sup>The negative transgenic plants detected by PCR analysis.

**Supplemental Table S4.** The phenotype of *OsDR11L-Flag*-overexpression T<sub>0</sub> plants inoculated with *Xoo* strain PXO99

| <b>Rice material</b>           | <b>Lesion area (%)<sup>a</sup></b> | <b><i>P</i>-value<sup>b</sup></b> |
|--------------------------------|------------------------------------|-----------------------------------|
| OsDR11L-Flag-oe1               | 62.0 ± 9.6                         | 0.404                             |
| OsDR11L-Flag-oe2               | 81.6 ± 8.0                         | 0.020                             |
| OsDR11L-Flag-oe3               | 84.8 ± 11.6                        | 0.010                             |
| OsDR11L-Flag-oe4               | 74.3 ± 16.4                        | 0.125                             |
| OsDR11L-Flag-oe5               | 77.2 ± 15.1                        | 0.051                             |
| OsDR11L-Flag-oe6               | 56.1 ± 12.9                        | 0.232                             |
| OsDR11L-Flag-oe7               | 82.2 ± 10.6                        | 0.018                             |
| OsDR11L-Flag-oe8               | 66.0 ± 13.0                        | 0.386                             |
| OsDR11L-Flag-oe9 <sup>c</sup>  | 59.9 ± 13.2                        | 0.331                             |
| OsDR11L-Flag-oe10 <sup>c</sup> | 60.8 ± 14.5                        | 0.385                             |
| Mudanjiang 8 (wild type)       | 63.7 ± 13.6                        |                                   |

<sup>a</sup>Data were from four to five flag leaves of each plant at the booting stage. Disease on leaves was scored at 14 days after infection.

<sup>b</sup>Each *P*-value was calculated in comparison with wild type Mudanjiang 8.

<sup>c</sup>The negative transgenic plants detected by PCR analysis.



**Supplemental Table S5.** The phenotype of *OsDR11L*-suppressing T<sub>0</sub> plants after inoculation with *Xoo* strain PXO99

| <b>Rice material</b>        | <b>Lesion area (%)<sup>a</sup></b> | <b><i>P</i>-value<sup>b</sup></b> |
|-----------------------------|------------------------------------|-----------------------------------|
| OsDR11L-RNAi1               | 67.6 ± 3.5                         | 0.023                             |
| OsDR11L-RNAi2               | 73.2 ± 9.6                         | 0.002                             |
| OsDR11L-RNAi3               | 72.0 ± 11.0                        | 0.009                             |
| OsDR11L-RNAi4               | 74.3 ± 15.7                        | 0.015                             |
| OsDR11L-RNAi5               | 65.3 ± 12.7                        | 0.001                             |
| OsDR11L-RNAi6               | 98.5 ± 2.1                         | 0.185                             |
| OsDR11L-RNAi7               | 64.3 ± 10.3                        | 0.003                             |
| OsDR11L-RNAi8               | 72.8 ± 8.5                         | 0.001                             |
| OsDR11L-RNAi9               | 97.8 ± 2.7                         | 0.368                             |
| OsDR11L-RNAi10              | /                                  | /                                 |
| OsDR11L-RNAi1 <sup>c</sup>  | 94.9 ± 6.8                         | 0.272                             |
| OsDR11L-RNAi12 <sup>c</sup> | 95.0 ± 10.0                        | 0.344                             |
| Minghui 63 (wild type)      | 97.2 ± 3.5                         |                                   |

<sup>a</sup>Data were from four to five flag leaves of each plant at the booting stage. Disease on leaves was scored at 14 days after infection.

<sup>b</sup>Each *P*-value was calculated in comparison with wild-type Minghui 63.

<sup>c</sup>The negative transgenic plants detected by PCR analysis.

**Supplemental Table S6. Primers used for PCR amplification**

| Gene name<br>(GenBank<br>accession<br>number) | Primer name             | Forward primer (5'-3')                       | Reverse primer (5'-3')                           | Use                                                    |
|-----------------------------------------------|-------------------------|----------------------------------------------|--------------------------------------------------|--------------------------------------------------------|
| OsDR11<br>(KR107935)                          | 39C8-GSP2/39C8-GSP3     | CTTTCCTTTCCTATCCCAAC                         | AGCCGAGAGAGAGAGAAA<br>GA                         | Sequencing OsDR11                                      |
|                                               | 39C8-8F/39C8-6R         | GTCCCAGGAAATCCCTCGTT                         | CTGCGGTAGCTTTGGTAAC<br>TC                        | Sequencing OsDR11                                      |
|                                               | 39C8-3F                 | TTGGATGGAGTTACCCCTGTG                        |                                                  | Sequencing OsDR11                                      |
|                                               | 39c8mir-1/2             | AGAACGGGATGAAACCTGGATC<br>TCAGGAGATTCAGTTTGA | TGAGATCCAGGTTTCATCCC<br>GTTCTGCTGCTGCTACAGC<br>C | Oligos for artificial<br>microRNA vector of<br>OsDR11S |
|                                               | 39c8mir-3/4             | CTAGATCGAGGATTCATCCCGTT<br>TTCCTGCTGCTAGGCTG | AAAACGGGATGAATCCTCG<br>ATCTAGAGAGGCAAAAGTG<br>AA | Oligos for artificial<br>microRNA vector of<br>OsDR11S |
|                                               | F3DSF1732/<br>F3DSR2253 | AGACTAGTGGTACCTTGTGTTCA<br>AATTCGGA ACTGG    | CGGAGCTCGGATCCTTTGT<br>AATCAGGCACTTTAATG         | Oligos for RNAi<br>vector of OsDR11L                   |
|                                               | 39C8-5F/39C8-6R         | TCCCTGTCAGCGTGATTATG                         | CTGCGGTAGCTTTGGTAAC<br>TC                        | Quantitative PCR for<br>OsDR11S expression<br>analysis |
|                                               | 39C8-6F/39C8-7R         | GAATGTTGGGATAGGGAAAGG                        | ACGGGATGAAACCTGGATC<br>TAC                       | Quantitative PCR for<br>OsDR11S expression             |

|                       |                              |                                  |                                   |                                                                                |
|-----------------------|------------------------------|----------------------------------|-----------------------------------|--------------------------------------------------------------------------------|
|                       | 83J4-2F/83J4-2R              | CGGAACTGGTTTACTATCG              | CAGGCACTTTAATGTACTCC<br>G         | analysis<br>Quantitative PCR for<br><i>OsDR11L</i> expression<br>analysis      |
|                       | 39C8-4F2/39C8pmalR-<br>BamH1 | ctggatccATGGAGTGCTTGGCCGaga<br>t | ctggatccTCACCTTAATAGCAC<br>TGGAC  | Amplifying <i>OsDR11S</i><br>coding region                                     |
|                       | 39C8PET28F-NDE1/<br>39C8-4R2 | atcatatgATGGAGTGCTTGGCCGAG<br>AT | CTGGATCCCCTTAATAGCAC<br>TGGACTTGG | Amplifying <i>OsDR11S</i><br>coding region                                     |
|                       | 39C8-4F4/39R-XBA1            | ATTCTAGAATGGAGTGCTTGGCC<br>GAGAT | CTTCTAGACCTTAATAGCAC<br>TGGACTTG  | Amplifying <i>OsDR11S</i><br>coding region                                     |
|                       | expF3-2R                     | ATGTCGACCTACATACAAGCAAC<br>AAAT  |                                   | Amplifying <i>OsDR11L</i><br>coding region                                     |
|                       | 39C8-4F3/114F3-BamH<br>1R    | CTGAATTCATGGAGTGCTTGGCC<br>GAGAT | atggatccCATACAAGCAACAA<br>ATGAGC  | Amplifying <i>OsDR11L</i><br>coding region                                     |
|                       | F3R-XBA1                     | CTTCTAGACATACAAGCAACAAA<br>TGAGC |                                   | Amplifying <i>OsDR11L</i><br>coding region                                     |
| pMCG161<br>(AY572837) | pMCGF/R                      | GGCTCACCAAACCTTAAACAA            | CTGAGCTACACATGCTCAG<br>GTT        | Identifying positive<br>RNAi transgenic plants                                 |
| IRS154                | IRS154F/R                    | CTTGCGAAGGATAGTGGGAT             | CCCTGCCTTCATACGCTA                | Identifying positive<br>artificial<br>microRNA-suppressed<br>transgenic plants |
| <i>GUS</i>            | GUS-2F/2R                    | CCAGGCAGTTTTAACGATCAGTT          | GAGTGAAGATCCCTTTCTT               | Amplifying <i>GUS</i>                                                          |

|                           |                   |                                       |                                       |                                                     |
|---------------------------|-------------------|---------------------------------------|---------------------------------------|-----------------------------------------------------|
| (AF234297)                |                   | CGC                                   | GTTACCG                               |                                                     |
| <i>LOX</i><br>(D14000)    | LOXF/R            | GCATCCCCAACAGCACATC                   | AATAAAGATTTGGGAGTGA<br>CATATTGG       | Quantitative PCR for<br>gene expression<br>analysis |
| <i>AOS2</i><br>(AY062258) | AOS2F/R           | CAATACGTGTACTGGTCGAATG<br>G           | AAGGTGTCGTACCGGAGGA<br>A              | Quantitative PCR for<br>gene expression<br>analysis |
| <i>PAD4</i><br>(CX118864) | PAD4F/R           | GCCAGCTCCCCTACGACTTC                  | CGTGTGCGGTGTAGGTTGT<br>T              | Quantitative PCR for<br>gene expression<br>analysis |
| <i>PR1b</i><br>(U89895)   | PR1bF/R           | GGCAACTTCGTCCGGACAGA                  | CCGTGGACCTGTTTACATT<br>TTCA           | Quantitative PCR for<br>gene expression<br>analysis |
| pGADT7                    | 5ADLDISA/3ADLDISA | CTATTCGATGATGAAGATACCCC<br>ACCAAACCCA | GTGAACTTGCGGGGTTTTT<br>CAGTATCTACGATT | Sequencing                                          |
|                           | T7/Sp6            | TAATACGACTCACTATAGGG                  | TAATACGACTCACTATAGG<br>G              | Sequencing                                          |
| <i>Actin</i><br>(X15865)  | Actin-F/Actin-R   | TGTATGCCAGTGGTCGTACCA                 | CCAGCAAGGTCGAGACGA<br>A               | Quantitative PCR for<br>gene expression<br>control  |
